# Supplementary material for: The eyes know it: Toddlers' visual scanning of sad faces is predicted by their theory of mind skills
Source: PLoS One. 2018 Dec 6;13(12):e0208524. doi: 10.1371/journal.pone.0208524 (PMC6283596; doi:10.1371/journal.pone.0208524)
Supplement: S1 Dataset — (XLSX) [file pone.0208524.s001.xlsx]

## Sheet: Sheet1
Gender	Age (months)	Emotional_PersTaking_Total	VPT_Level1a_Total	VPT_Level1b_Total	VPT_Level1_Total	LookingT_Face_DIFF	LookingT_Eyes_DIFF	LookingT_Mouth_DIFF	LookingT_Distractors_DIFF	Gender/EPT	Gender/VPT	Prop_LookingT_Face_PRE	Prop_LookingT_Eyes_PRE	Prop_LookingT_Mouth_PRE	Prop_LookingT_Distractors_PRE	Prop_LookingT_Face_SAD	Prop_LookingT_Eyes_SAD	Prop_LookingT_Mouth_SAD	Prop_LookingT_Distractors_SAD
Male	32	4	2	0	2	3222	2356	866	-608	-0.18	-0.09	0.61	0.59	0.02	0.13	0.75	0.67	0.08	0.07
Male	33	2	0	1	1					0.6	0.3
Male	30	4	2	0	2	3663	-1490	5739	-4284	-0.18	-0.09	0.52	0.12	0.35	0.36	0.7	0	0.7	0.02
Male	30	2	2	0	2	-799	-1200	401	-1108	0.6	-0.09	0.64	0.1	0.55	0.1	0.5	0	0.5	0.01
Male	30	6	1	0	1					-0.97	0.3					0
Male	30	3	0	0	0	516	-3956	4472	-454	0.21	0.69	0.67	0.61	0.05	0.81	0.61	0.26	0.35	0.02
Male	30	4	2	0	2	4991	-444	5435	-938	-0.18	-0.09	0.27	0.04	0	0.65	0.57	0	0.57	0.05
Male	29	3	2	1	3	2936	0	2936	1552	0.21	-0.48	0.35	0	0.03	0.14	0.5	0	0.5	0.13
Male	30	4	0	2	2	5857	-628	6177	-1856	-0.18	-0.09	0.49	0.19	0.1	1.84	0.82	0.12	0.68	0.02
Male	30	3	2	1	3	32	-1072	1016	668	0.21	-0.48	0.81	0.78	0.05	0.38	0.7	0.6	0.09	0.09
Male	30	3	0	0	0	3278	-1948	5226	-2550	0.21	0.69	0.34	0.18	0.25	1.4	0.52	0.02	0.5	0.07
Male	30	3	0	0	0	5184	-4340	9524	-544	0.21	0.69	0.11	0.03	0.03	0.18	0.75	0	0.75	0.12
Male	33	6	0	0	0	1352	-4347	5699	-1108	-0.97	0.69	0.45	0.35	0.11	0.18	0.72	0.29	0.43	0.08
Male	31	3	0	0	0	3068	-371	3439	-1934	0.21	0.69	0.63	0.58	0.05	0.21	0.82	0.06	0.76	0.05
Male	30	6	0	0	0					-0.97	0.69
Male	29	4	2	0	2	2448	-2021	3946	-2166	-0.18	-0.09	0.43	0.2	0.23	0.17	0.54	0.03	0.47	0
Male	30	1	0	0	0	131	-5272	5859	674	0.99	0.69	0.83	0.42	0.38	0.08	0.73	0	0.73	0.12
Male	29	5	1	0	1	3576	3636	192	-1348	-0.58	0.3	0.54	0.24	0.28	0.17	0.71	0.46	0.25	0.05
Male	30	3	0	1	1	2610	-838	6448	-116	0.21	0.3	0.53	0.41	0.12	0.1	0.63	0.29	0.55	0.08
Male	30	5	0	0	0	1993	-6326	8319	1390	-0.58	0.69	0.78	0.6	0.18	0	0.81	0.08	0.73	0.1
Male	30	4	2	0	2	3980	2642	1110	-2176	-0.18	-0.09	0.45	0.31	0.14	0.24	0.66	0.45	0.2	0.05
Male	30	5	1	0	1	3677	3759	-82	2732	-0.58	0.3	0.3	0.27	0.02	0.02	0.51	0.49	0.01	0.21
Male	34	4	1	0	1	5904	241	6381	-1115	-0.18	0.3	0.33	0.14	0.13	0.19	0.69	0.14	0.55	0.09
Male	36	5	2	1	3	6557	0	-159	339	-0.58	-0.48	0.34	0	0.01	0.03	0.75	0	0	0.05
Male	34	3	2	2	4	1894	-239	2691	-2551	0.21	-0.88	0.26	0.04	0.18	0.25	0.36	0.01	0.34	0.04
Male	34	3	2	1	3	2334	219	2513	-99	0.21	-0.48	0.26	0.18	0.05	0.03	0.38	0.17	0.21	0.02
Male	36	3	1	0	1	379	0	279	-420	0.21	0.3	0.01	0	0.01	0.03	0.03	0	0.03	0
Male	38	3	2	2	4	3490	-359	4128	-1613	0.21	-0.88	0.27	0.03	0.17	0.16	0.47	0	0.43	0.03
Male	34	3	2	1	3	3890	-1276	5624	1117	0.21	-0.48	0.49	0.3	0.13	0.14	0.69	0.17	0.5	0.2
Male	36	2	2	2	4	3369	1596	1235	-1912	0.6	-0.88	0.47	0.1	0.37	0.18	0.63	0.19	0.4	0.02
Male	34	3	1	0	1	1734	-1137	4606	-1435	0.21	0.3	0.68	0.41	0.09	0.16	0.7	0.28	0.4	0.04
Male	37	4	1	2	3	1993	138	2512	-459	-0.18	-0.48	0.58	0.26	0.26	0.18	0.63	0.24	0.4	0.13
Male	38	4	2	1	3	-159	-778	1735	-917	-0.18	-0.48	0.65	0.06	0.49	0.11	0.55	0	0.54	0.03
Male	34	4	2	2	4	2913	3689	-557	80	-0.18	-0.88	0.51	0.1	0.4	0.05	0.64	0.34	0.31	0.05
Male	34	4	0	2	2					-0.18	-0.09
Female	33	2	2	0	2					-0.93	0.14
Female	30	3	2	0	2					-0.32	0.14
Female	29	4	1	0	1					0.29	-0.46
Female	30	2	0	1	1	1646	2546	-900	-520	-0.93	-0.46	0.07	0	0.04	0.96	0.18	0.18	0	0
Female	30	4	1	2	3	4137	2676	1373	-572	0.29	0.75	0.03	0.01	0.03	0.56	0.31	0.19	0.11	0.05
Female	29	6	0	0	0	4456	347	4109	-2690	1.5	-1.07	0.63	0.54	0.09	0.78	0.85	0.49	0.36	0.01
Female	30	4	2	1	3	6721	3237	3484	-2600	0.29	0.75	0.31	0.27	0.24	1.84	0.73	0.46	0.27	0.1
Female	29	3	0	0	0	3580	850	4750	-1662	-0.32	-1.07	0.76	0.36	0.04	0.94	0.9	0.37	0.47	0.01
Female	31	3	0	0	0	1567	-1956	-817	-2172	-0.32	-1.07	0.47	0.16	0.16	1.72	0.51	0	0.22	0.12
Female	30	2	0	0	0	3385	2967	418	-3620	-0.93	-1.07	0.36	0.29	0.12	1.04	0.55	0.46	0.09	0.02
Female	29	3	0	0	0					-0.32	-1.07
Female	30	6	1	1	2	8654	7817	-273	-3996	1.5	0.14	0.13	0.05	0.08	0.37	0.71	0.59	0.05	0.04
Female	30	3	1	0	1	993	1161	-168	-362	-0.32	-0.46	0.72	0.68	0.04	0.03	0.61	0.58	0.03	0
Female	29	3	0	1	1	4918	4178	740	-5546	-0.32	-0.46	0.36	0.24	0.11	0.44	0.65	0.5	0.15	0
Female	33	1	2	2	4					-1.54	1.36
Female	31	4	0	0	0					0.29	-1.07
Female	30	2	0	0	0	3897	-544	6243	-1774	-0.93	-1.07	0.59	0.04	0.4	0.14	0.78	0	0.78	0
Female	30	3	2	0	2					-0.32	0.14
Female	29	5	0	0	0	3241	0	3751	-1508	0.89	-1.07	0.67	0	0.62	0.12	0.8	0	0.8	0
Female	36	2	2	1	3	6741	2433	4467	-756	-0.93	0.75	0.12	0.09	0.01	0.06	0.57	0.25	0.32	0
Female	33	3	2	2	4	4285	419	4563	-1057	-0.32	1.36	0.42	0.1	0.26	0.09	0.66	0.12	0.54	0.01
Female	34	5	2	0	2	4745	3029	1995	-2689	0.89	0.14	0.38	0.29	0.07	0.26	0.65	0.46	0.19	0.04
Female	34	3	1	1	2	3946	0	4823	1355	-0.32	0.14	0.32	0	0.25	0.23	0.54	0	0.54	0.29
Female	38	6	2	2	4	3251	598	3230	-3628	1.5	1.36	0.21	0	0.16	0.29	0.4	0.04	0.36	0
Female	34	4	0	0	0	2948	717	2231	-2749	0.29	-1.07	0.39	0.04	0.35	0.24	0.54	0.09	0.45	0.02
Female	34	5	1	2	3					0.89	0.75
Female	35	2	2	1	3	1595	-1775	3549	-1196	-0.93	0.75	0.64	0.52	0.11	0.16	0.66	0.32	0.34	0.05
Female	34	2	2	2	4	-1153	-159	-197	-319	-0.93	1.36	0.2	0.01	0.11	0.07	0.09	0	0.08	0.04
Female	31	2	2	2	4					-0.93	1.36
